# Supplementary material for: Prediction Model for Cognitive Impairment among Disabled Older Adults: A Development and Validation Study
Source: MDPI journal article supplement (doi:10.3390/healthcare12101028), 2024-05-15
Supplement: s1 [file s1]

**Supplementary Table S1.** The characteristics of external datasets.

| Variable                                    | Categories                               | Ex-validation set-1<br>(N=501) | Ex-validation set-2<br>(N=746) |
|---------------------------------------------|------------------------------------------|--------------------------------|--------------------------------|
| Gender, n (%)                               | Male                                     | 209 (42%)                      | 303 (41%)                      |
|                                             | Female                                   | 292 (58%)                      | 443 (59%)                      |
| Age, mean (SD)                              |                                          | 90.7 (10%)                     | 89.9 (10%)                     |
| Place of residence, n (%)                   | Urban                                    | 271 (54%)                      | 447 (60%)                      |
|                                             | Rural                                    | 230 (46%)                      | 299 (40%)                      |
| Marital status, n (%)                       | Married                                  | 138 (28%)                      | 225 (30%)                      |
|                                             | Others                                   | 363 (72%)                      | 521 (70%)                      |
| Education level, n (%)                      | Absence of formal education<br>(<1 year) | 327 (65%)                      | 469 (63%)                      |
|                                             | Primary education (1~6 years)            | 136 (27%)                      | 187 (25%)                      |
|                                             | Higher education (over 6<br>years)       | 38 (8%)                        | 90 (12%)                       |
| ADL score, mean (SD)                        |                                          | 9.4 (2.6)                      | 9.3 (2.6)                      |
| IADL score, mean (SD)                       |                                          | 19.7 (5.1)                     | 19.0 (5.0)                     |
| Smoking, n (%)                              | No                                       | 452 (90%)                      | 641 (86%)                      |
|                                             | Yes                                      | 49 (10%)                       | 105 (14%)                      |
| Drinking, n (%)                             | No                                       | 457 (91%)                      | 642 (86%)                      |
|                                             | Yes                                      | 44 (9%)                        | 104 (14%)                      |
| Daily exercise, n (%)                       | No                                       | 405 (81%)                      | 561 (75%)                      |
|                                             | Yes                                      | 96 (19%)                       | 185 (25%)                      |
| Routine medical checkup,<br>n (%)           | No                                       | 241 (48%)                      | 171 (23%)                      |
|                                             | Yes                                      | 260 (52%)                      | 575 (77%)                      |
| Kyphosis, n (%)                             | No                                       | 211 (42%)                      | 382 (51%)                      |
|                                             | Yes                                      | 290 (58%)                      | 364 (49%)                      |
| VI, n (%)                                   | No                                       | 312 (62%)                      | 446 (60%)                      |
|                                             | Yes                                      | 189 (38%)                      | 300 (40%)                      |
| HI, n (%)                                   | No                                       | 312 (62%)                      | 473 (63%)                      |
|                                             | Yes                                      | 189 (38%)                      | 273 (37%)                      |
| Wearing hearing aids, n<br>(%)              | No                                       | 344 (69%)                      | 521 (70%)                      |
|                                             | Yes                                      | 157 (31%)                      | 225 (30%)                      |
| Chronic diseases, n (%)                     | 0                                        | 247 (49%)                      | 352 (47%)                      |
|                                             | 1                                        | 153 (31%)                      | 231 (31%)                      |
|                                             | 2                                        | 58 (12%)                       | 101 (14%)                      |
|                                             | ≥3                                       | 43 (8%)                        | 62 (8%)                        |
| Wearing dentures, n (%)                     | No                                       | 356 (71%)                      | 526 (71%)                      |
|                                             | Yes                                      | 145 (29%)                      | 220 (29%)                      |
| Number of natural teeth,<br>median (Q1, Q3) |                                          | 5 (0, 12)                      | 6 (1, 14)                      |
| Tooth cleaning behavior, n<br>(%)           | Rarely brush teeth                       | 360 (72%)                      | 471 (63%)                      |
|                                             | Regular toothbrushing                    | 141 (28%)                      | 275 (37%)                      |
| Childhood famine                            | No                                       | 140 (28%)                      | 171 (23%)                      |

|                                              |           |             |             |
|----------------------------------------------|-----------|-------------|-------------|
| experiences, n (%)                           | Yes       | 361 (72%)   | 575 (77%)   |
| CC (cm), mean (SD)                           |           | 28.8 (6.4)  | NA          |
| WC (cm), mean (SD)                           |           | 79.9 (13.5) | 80.9 (15.3) |
| HC (cm), mean (SD)                           |           | NA          | NA          |
| BMI (kg/m <sup>2</sup> ), mean (SD)          |           | 21.4 (4.1)  | 21.2 (4.6)  |
| WHR (%), mean (SD)                           |           | NA          | NA          |
| WHtR (%), mean (SD)                          |           | 0.5 (0.1)   | 0.5 (0.1)   |
| WCR (%), mean (SD)                           |           | 2.9 (0.7)   | NA          |
| Daily housework, n (%)                       | Always    | 81 (16%)    | 107 (14%)   |
|                                              | Sometimes | 34 (7%)     | 59 (8%)     |
|                                              | Never     | 386 (77%)   | 580 (78%)   |
| Garden work, n (%)                           | Always    | 43 (9%)     | 64 (9%)     |
|                                              | Sometimes | 15 (3%)     | 47 (6%)     |
|                                              | Never     | 443 (88%)   | 635 (85%)   |
| Reading newspapers or books, n (%)           | Always    | 28 (6%)     | 58 (8%)     |
|                                              | Sometimes | 33 (7%)     | 45 (6%)     |
|                                              | Never     | 440 (87%)   | 643 (86%)   |
| Raising domestic animals or pets, n (%)      | Always    | 36 (7%)     | 48 (6%)     |
|                                              | Sometimes | 12 (2%)     | 28 (4%)     |
|                                              | Never     | 453 (91%)   | 670 (90%)   |
| Playing cards or mah-jongg, n (%)            | Always    | 11 (2%)     | 18 (2%)     |
|                                              | Sometimes | 35 (7%)     | 40 (5%)     |
|                                              | Never     | 455 (91%)   | 688 (93%)   |
| Watching tv or listening to the radio, n (%) | Always    | 216 (43%)   | 295 (40%)   |
|                                              | Sometimes | 92 (18%)    | 133 (18%)   |
|                                              | Never     | 193 (39%)   | 318 (43%)   |

---

\* ADL: activities of daily living; IADL: instrumental activities of daily living; CC: Calf circumference; WC: waist circumference; HC: hip circumference; BMI: body mass index; WHR: waist-to-hip ratio; WHtR: waist-to-height ratio; WCR: waist-to-calf ratio; NA: not applicable.
